# Supplementary material for: miR-504 suppresses mesenchymal phenotype of glioblastoma by directly targeting the FZD7-mediated Wnt–β-catenin pathway
Source: J Exp Clin Cancer Res. 2019 Aug 16;38:358. doi: 10.1186/s13046-019-1370-1 (PMC6697940; doi:10.1186/s13046-019-1370-1)
Supplement: Supplementary file 6 — Table S4. List of top 200 significant differentially upregulated genes in miR-504 low-expression tumors. (XLSX 14 kb) [file 13046_2019_1370_MOESM6_ESM.xlsx]

## Sheet: Sheet1
List of top 200 differently up-regulated genes in miR-504 low-expression tumors
Gene ID
EMP3
LGALS3
ANXA2
TIMP1
LGALS1
CLIC1
EFEMP2
CD151
TAGLN2
PTRF
PYGL
FLJ21963
CD63
ANXA5
TRIP6
GUSB
IQGAP1
ARSJ
RBMS1
MRC2
ANXA2P2
IGFBP2
SRPX2
EFNB2
ANKRD25
SPRY4
CLEC5A
TNFAIP6
SLC27A3
VAV3
ANXA1
CCDC109B
CENTD3
SERPINH1
PLP2
TNFRSF1A
POSTN
TUBB6
DYNLT3
PTX3
SYDE1
ITGA5
SLC2A10
SERPINB6
EHD2
PLOD3
TSPAN4
CD97
TNFRSF12A
RRBP1
PLA2G5
PDPN
DPYD
CA12
DUSP4
ICAM3
S100A13
GSTK1
LAMC1
ADAM12
ADM
SPRY2
CDKN1A
CHI3L1
SLC43A3
LMNA
HEXB
TRIP4
SEC61G
MSN
ACTN1
FZD7
C7orf42
PDGFA
CHMP2A
LDHA
PLAU
HRH1
SRPX
RNASE4
PLOD2
IL1RAP
MEOX2
TGFBI
OSBPL3
FBXO17
STEAP3
PIPOX
TMBIM1
ASL
ZYX
ANG
FSTL1
DDB2
TWSG1
DPY19L1
KIAA0323
PCOLCE
MDK
SLC2A4RG
BCL3
AK3L1
TMED9
C13orf18
COL6A1
MICALL2
MAP3K6
PCSK5
SPRY1
PLXNB2
PTPN14
OSBPL10
PLS3
C1orf78
DUSP6
PLEKHA4
LAMA2
DLC1
TM9SF1
PLOD1
PHLDA3
IER5
ELOVL2
LZTS1
SHC1
NNMT
RPS27L
DCTD
NRP1
AEBP1
XKR8
ABCC3
FNDC3B
EPHB4
PDIA3
CD58
PPIC
FZD1
DNAJB1
GLT25D1
SLC22A18
IFITM3
S100A10
MMP14
GRB10
TCIRG1
LRRC16
PGCP
TMEPAI
BHLHB2
EMP1
GDF15
LAMB2
EMILIN1
COL5A2
ACTN4
TUBA1C
SLC25A24
PDIA4
FLNA
CAST
TRIP10
PIGT
MYO1E
FZD5
AHNAK2
DPP4
FAM129A
KLF6
PBEF1
M6PRBP1
RAB13
ARHGAP29
ILK
LIF
PLAUR
CDH6
UPP1
TMEM51
ITGA7
NPEPL1
CAPG
STK17A
RAB20
MYD88
CALU
HSPB1
LOXL1
KDELR3
TGFB1I1
CHSY1
TAGLN
LOX
BAX
PRDX6
RHOC
KCTD14
MRLC2
RPN2
CTSA
